# Supplementary material for: LY-CoV1404 (bebtelovimab) potently neutralizes SARS-CoV-2 variants
Source: bioRxiv or medRxiv preprint supplement (doi:10.1101/2021.04.30.442182), 2022-03-24
Supplement: Supplementary file [file media-1.pdf]

**Fig S1. ACE2 Competition**

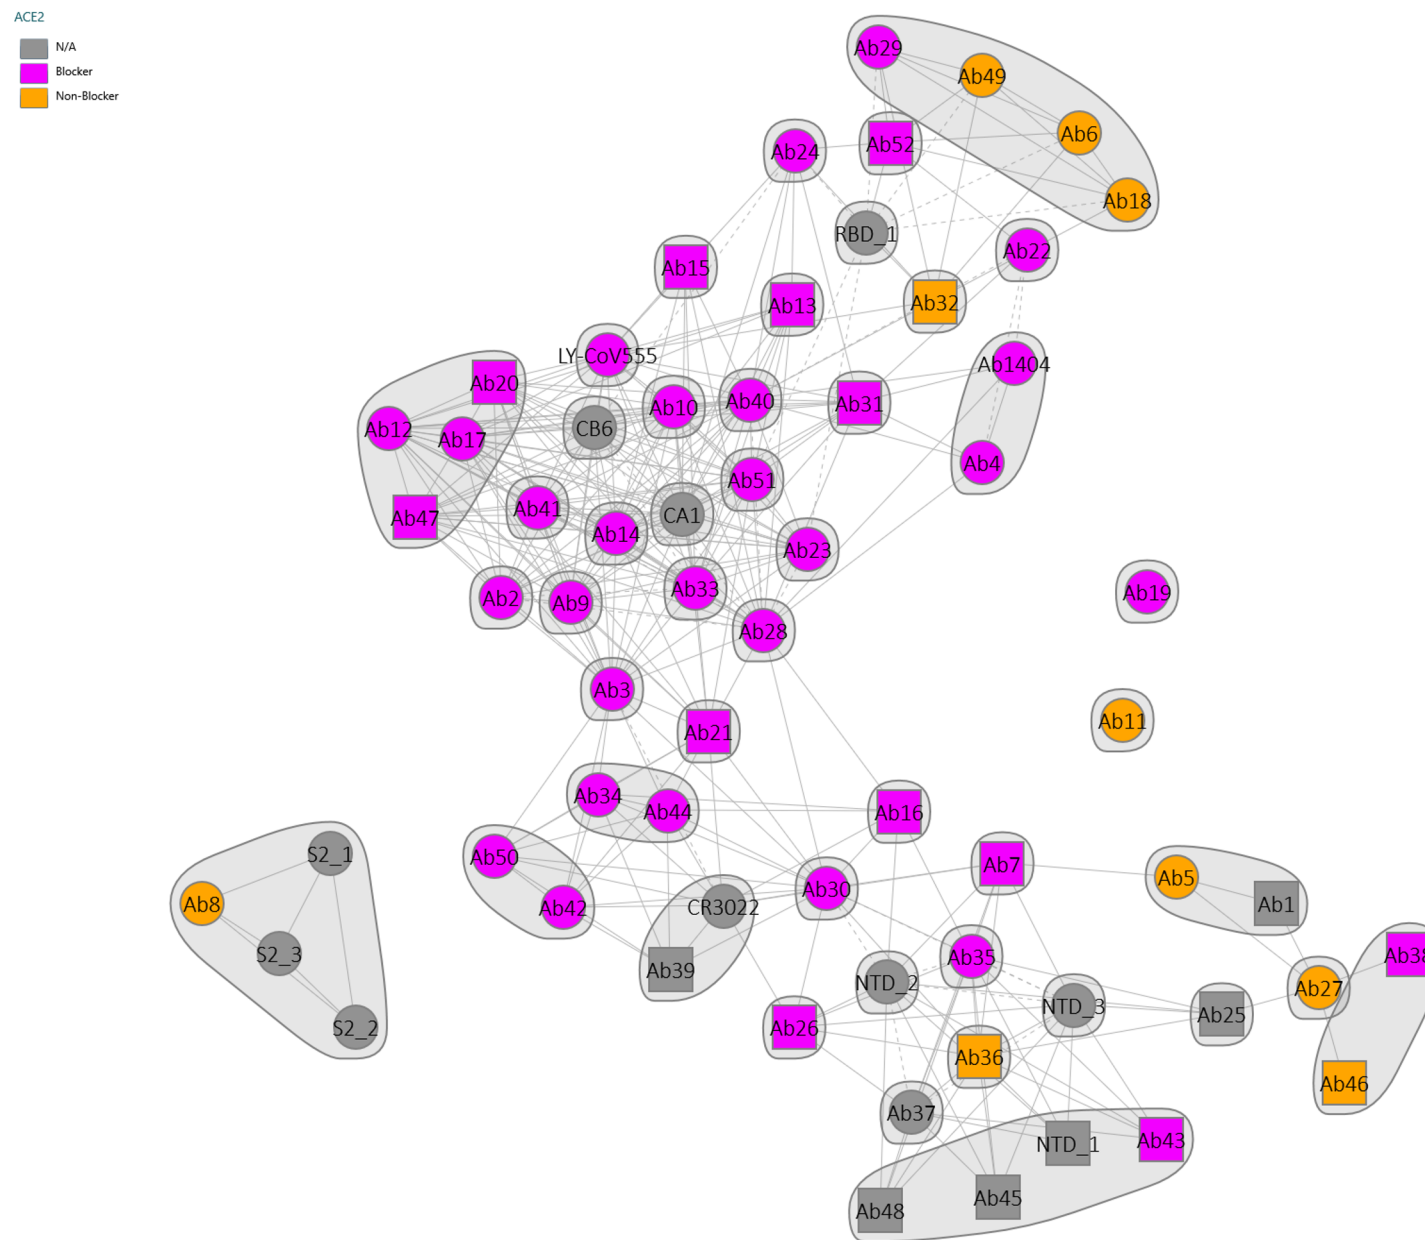

**Fig S2.** LY-CoV1404 binding to trimeric S protein

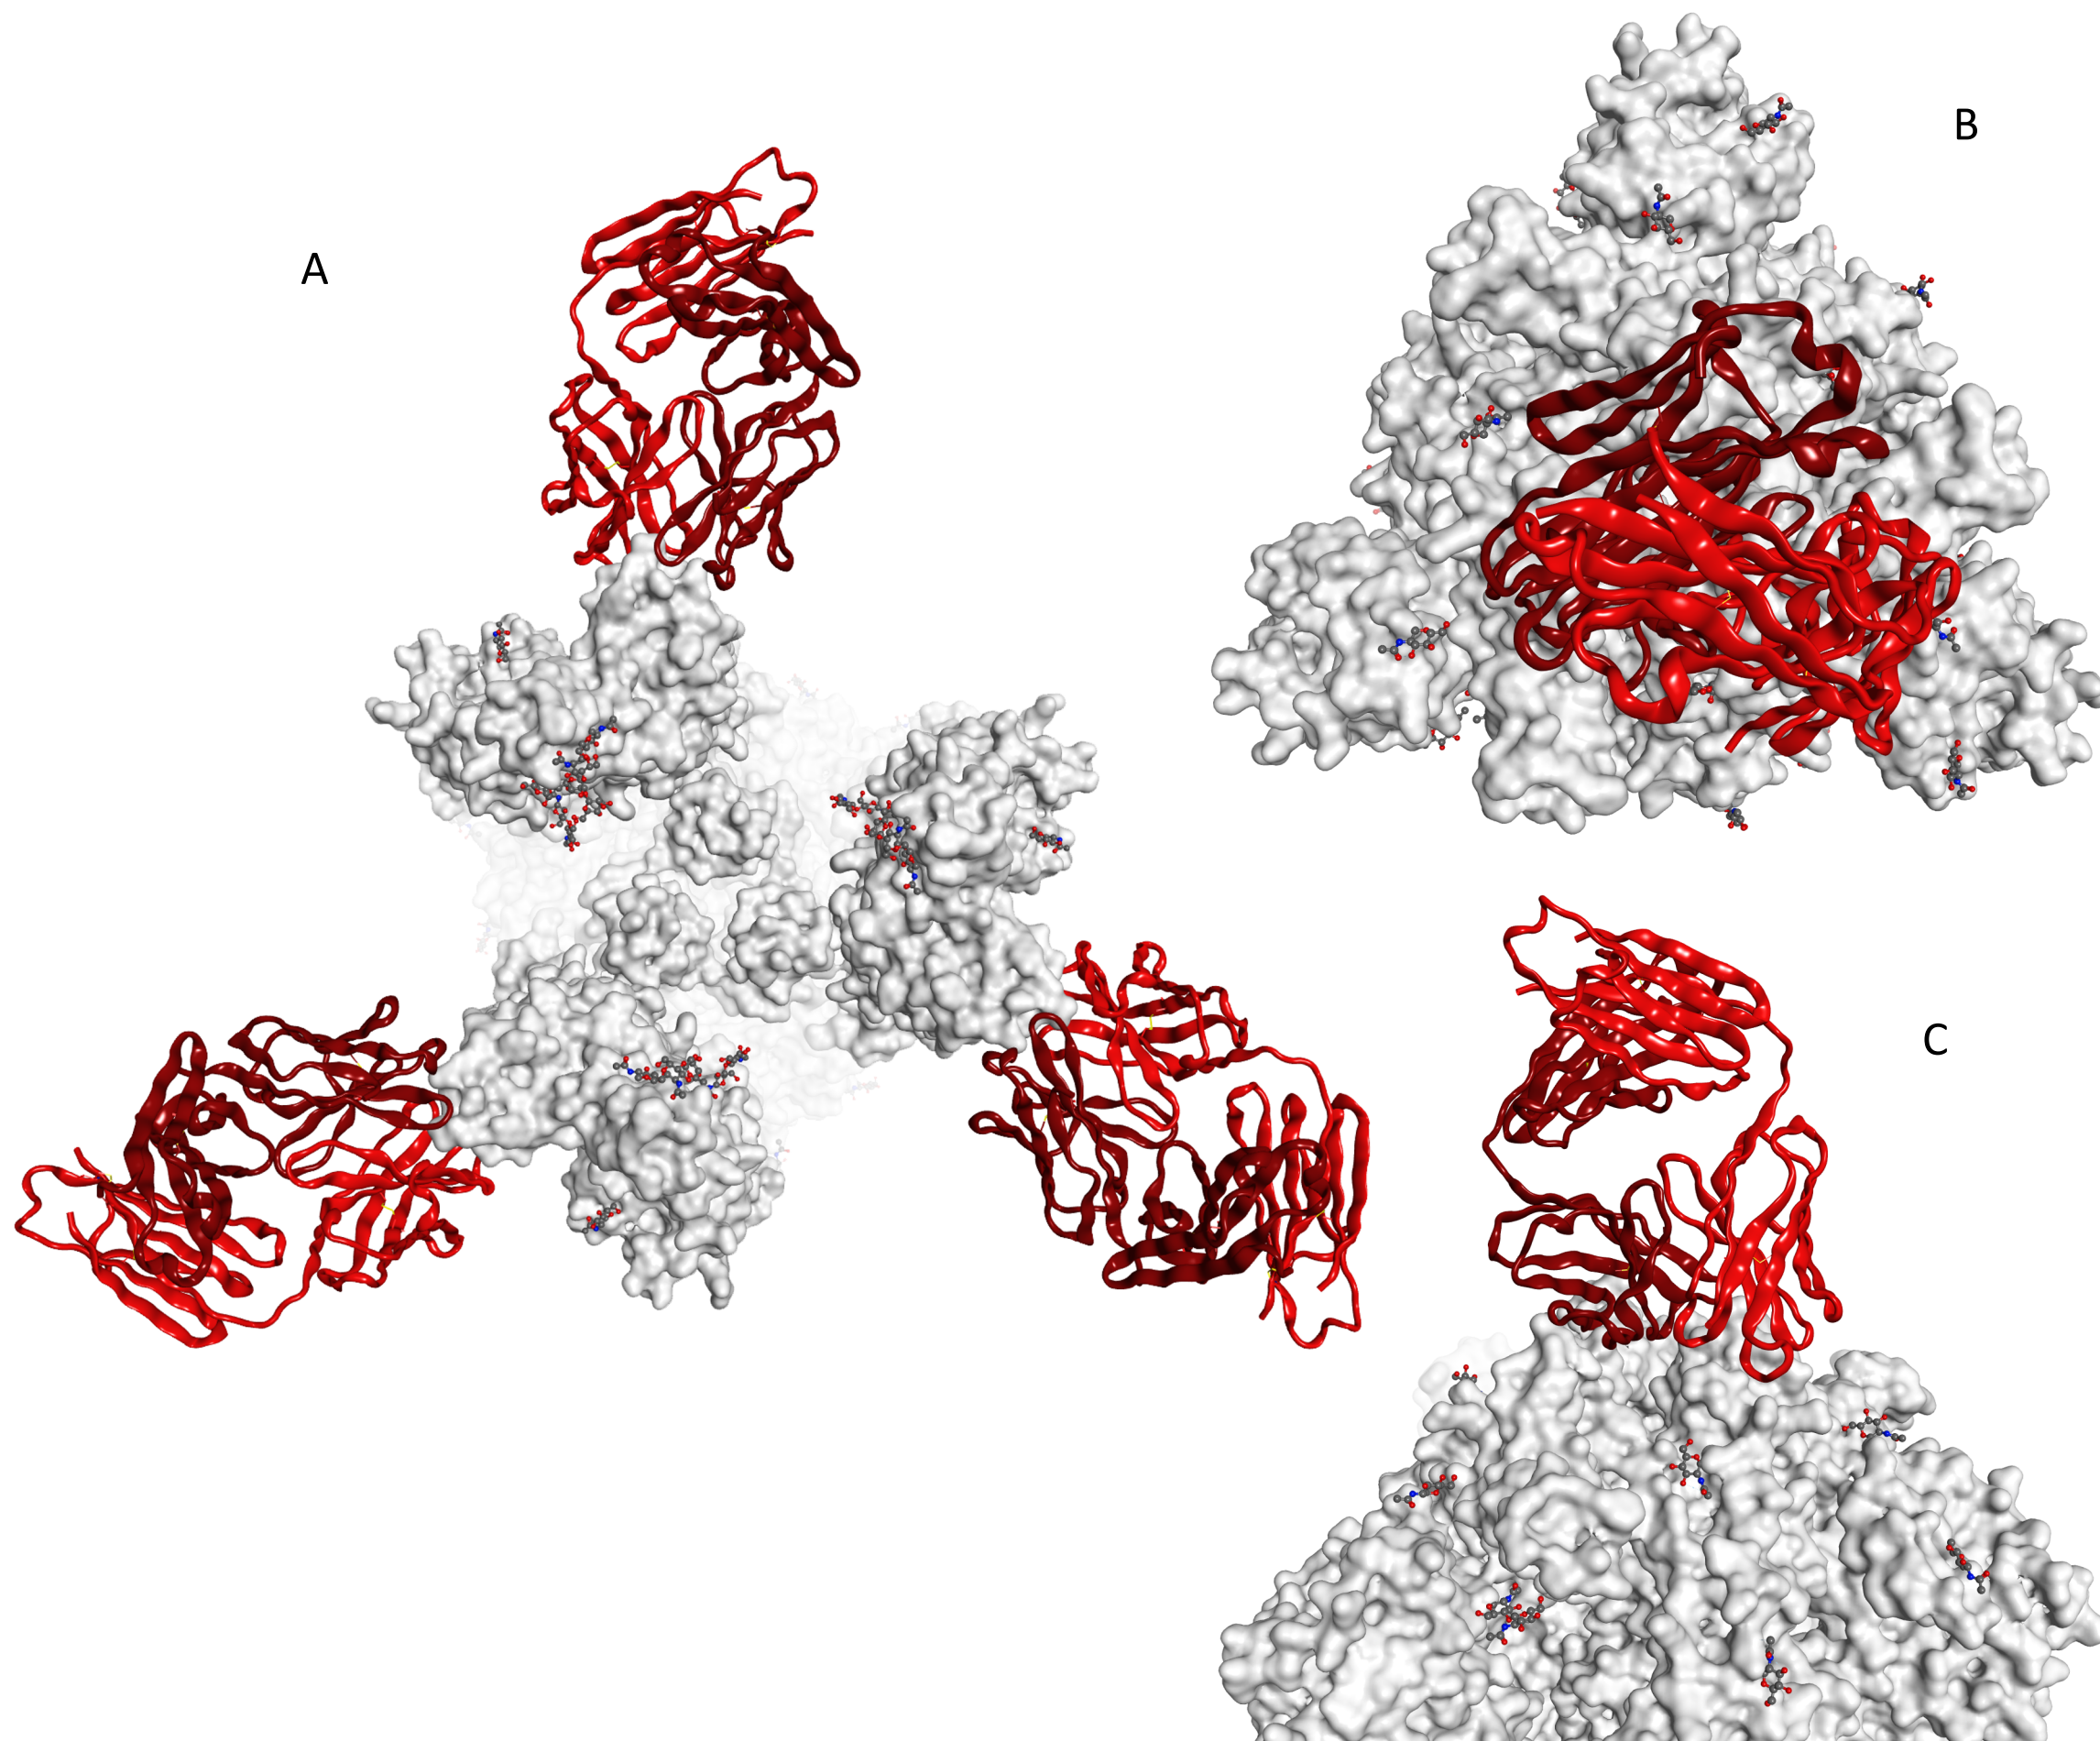



**Table S1.** Crystallographic statistics

|                                                                           | LY-CoV1404 + spike protein RBD |
|---------------------------------------------------------------------------|--------------------------------|
| <b>Data collection</b>                                                    |                                |
| Space group                                                               | P2(1)2(1)2(1)                  |
| Cell dimensions<br>a, b, c (Å)                                            | 73.09, 107.69, 190.47          |
| Cell dimensions<br>alpha, beta, gamma (°)                                 | 90, 90, 90                     |
| Resolution (Å)                                                            | 94-2.43<br>(2.57-2.43)*        |
| R-merge                                                                   | 0.069 (0.690)                  |
| I / sigma(I)                                                              | 15.0 (2.5)                     |
| Completeness (%)                                                          | 99.8 (99.9)                    |
| Redundancy                                                                | 6.4 (6.8)                      |
|                                                                           |                                |
| <b>Refinement</b>                                                         |                                |
| Resolution (Å)                                                            | 94-2.43                        |
| No. of reflections                                                        | 57431                          |
| R-work (%) / R-free (%)                                                   | 23.5 / 26.4                    |
| No. of non-hydrogen atoms<br>protein / ligand / water                     | 9236 / 14 / 73                 |
| B-factors<br>protein / ligand / water                                     | 60.2 / 72.8 / 44.8             |
| Root mean squared deviations<br>bond length (Å) /<br>bond angle (°)       | 0.011 / 1.63                   |
| Ramachandran distribution<br>phi-psi favored (%) /<br>phi-psi allowed (%) | 97.0 / 99.8                    |

\*Values in parenthesis denote highest resolution shell

**Table S2.** Summary of atomic interactions at the RBD epitope.

---

| <b>Antibody</b> | <b>PDB ID</b> | <b>atom-atom contacts</b> | <b>H-bonds</b> | <b>RBD contact surface area Å<sup>2</sup></b> |
|-----------------|---------------|---------------------------|----------------|-----------------------------------------------|
| LY-CoV1404      |               | 198                       | 12             | 584                                           |
| REGN10987       | 6XDG          | 70                        | 6              | 343                                           |
| Fab 2-7         | 7LSS          | 156                       | 10             | 496                                           |
